# Supplementary material for: Hierarchical NiCo2O4@CuS composite electrode with enhanced surface area for high-performance hybrid supercapacitors
Source: Royal Society of Chemistry journal article supplement (doi:10.1039/d4ra07808j), 2024-01-01
Supplement: d4ra07808j1.pdf [file d4ra07808j1.pdf]

## **Supporting Information**

### **Hierarchical NiCo<sub>2</sub>O<sub>4</sub>@CuS Composite Electrode with Enhanced Surface Area for High-Performance Hybrid Supercapacitors**

Chandu V. V. Muralee Gopi<sup>1</sup>, Dasha Kumar Kulurumotlakatla<sup>2</sup>, KVG Raghavendra<sup>3</sup>,

Maduru Suneetha\*<sup>4</sup>, R. Ramesh\*<sup>5</sup>

<sup>1</sup> Department of Electrical Engineering, University of Sharjah, Sharjah, P. O. Box 27272, United Arab Emirates.

<sup>2</sup> Graduate School of Convergence Science, Pusan National University, San 30 Jangjeon-dong, Geumjeong-gu, Busan 609-735, Republic of Korea.

<sup>3</sup> Department of Electrical Engineering, Pusan National University, Busan, Republic of South Korea.

<sup>4</sup> School of Chemical Engineering, Yeungnam University, 280 Daehak-Ro, Gyeongsan, Gyeongbuk, 38541, Republic of Korea.

<sup>5</sup> Department of Chemical Engineering, School of Mechanical, Chemical and Materials Engineering, Adama Science and Technology University, POBox1888, Adama, Ethiopia.

\* Corresponding authors: [msunithachem@gmail.com](mailto:msunithachem@gmail.com) (M. Suneetha)

[ramesh.redrouthu@astu.edu.et](mailto:ramesh.redrouthu@astu.edu.et) (Dr. R. Ramesh)

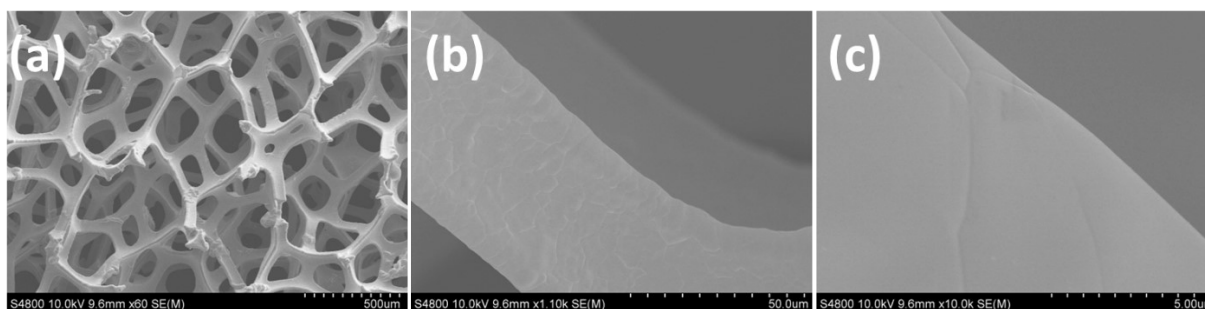

Fig. S1. SEM images of the bare Ni-foam at various magnifications.

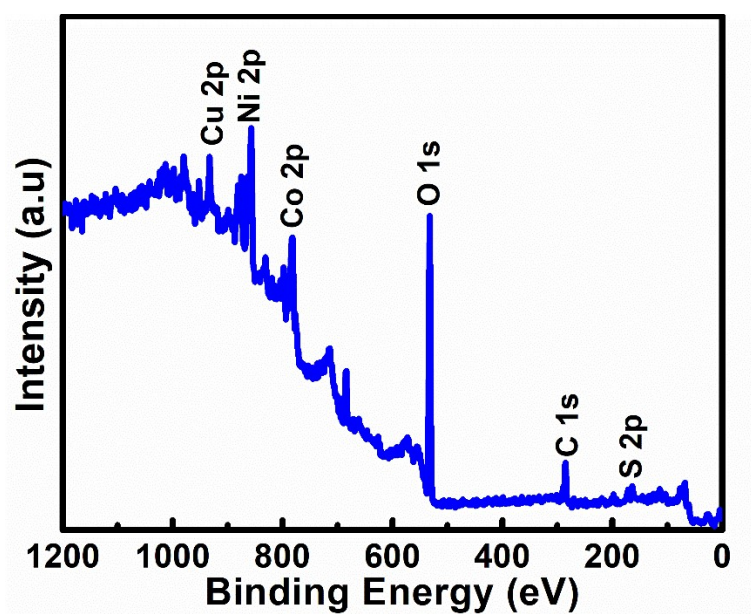

Fig. S2. XPS survey spectra of NiCo<sub>2</sub>O<sub>4</sub>@CuS composite electrode.

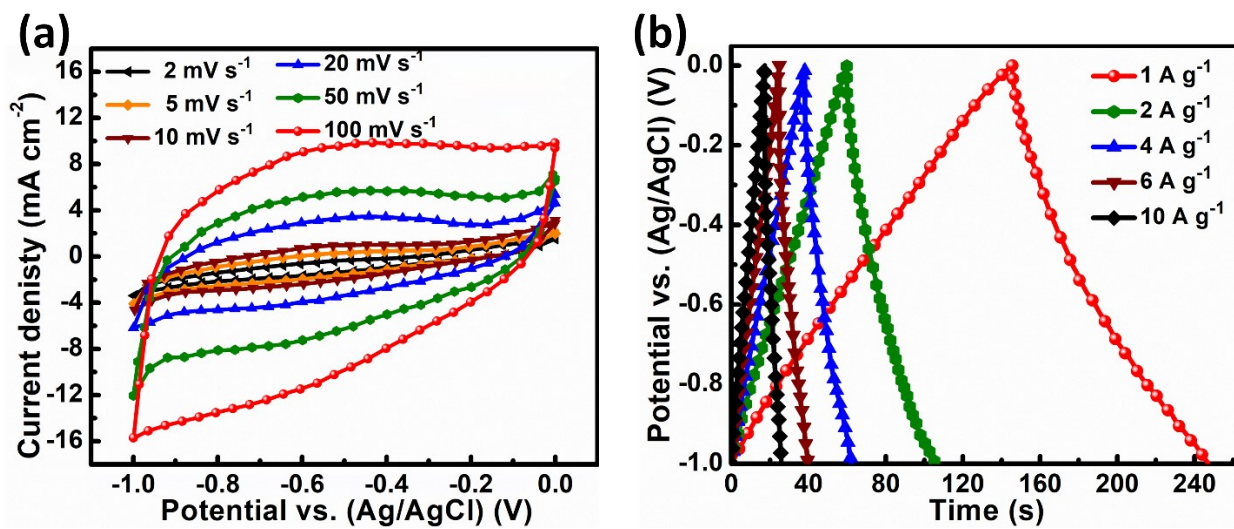

**Fig. S3.** In a three-electrode configuration (a) CV and (b) GCD plots of Graphene-ink electrode on the surface of Ni foam.
